# Supplementary material for: ICOS is required for the generation of both central and effector CD4+ memory T‐cell populations following acute bacterial infection
Source: Eur J Immunol. 2015 Apr 7;45(6):1706–15. doi: 10.1002/eji.201445421 (PMC4736665; doi:10.1002/eji.201445421)
Supplement: Supplementary file 1 — Figure s1 Figure s2 [file EJI-45-1706-s001.pdf]

Supporting Information Figure 1

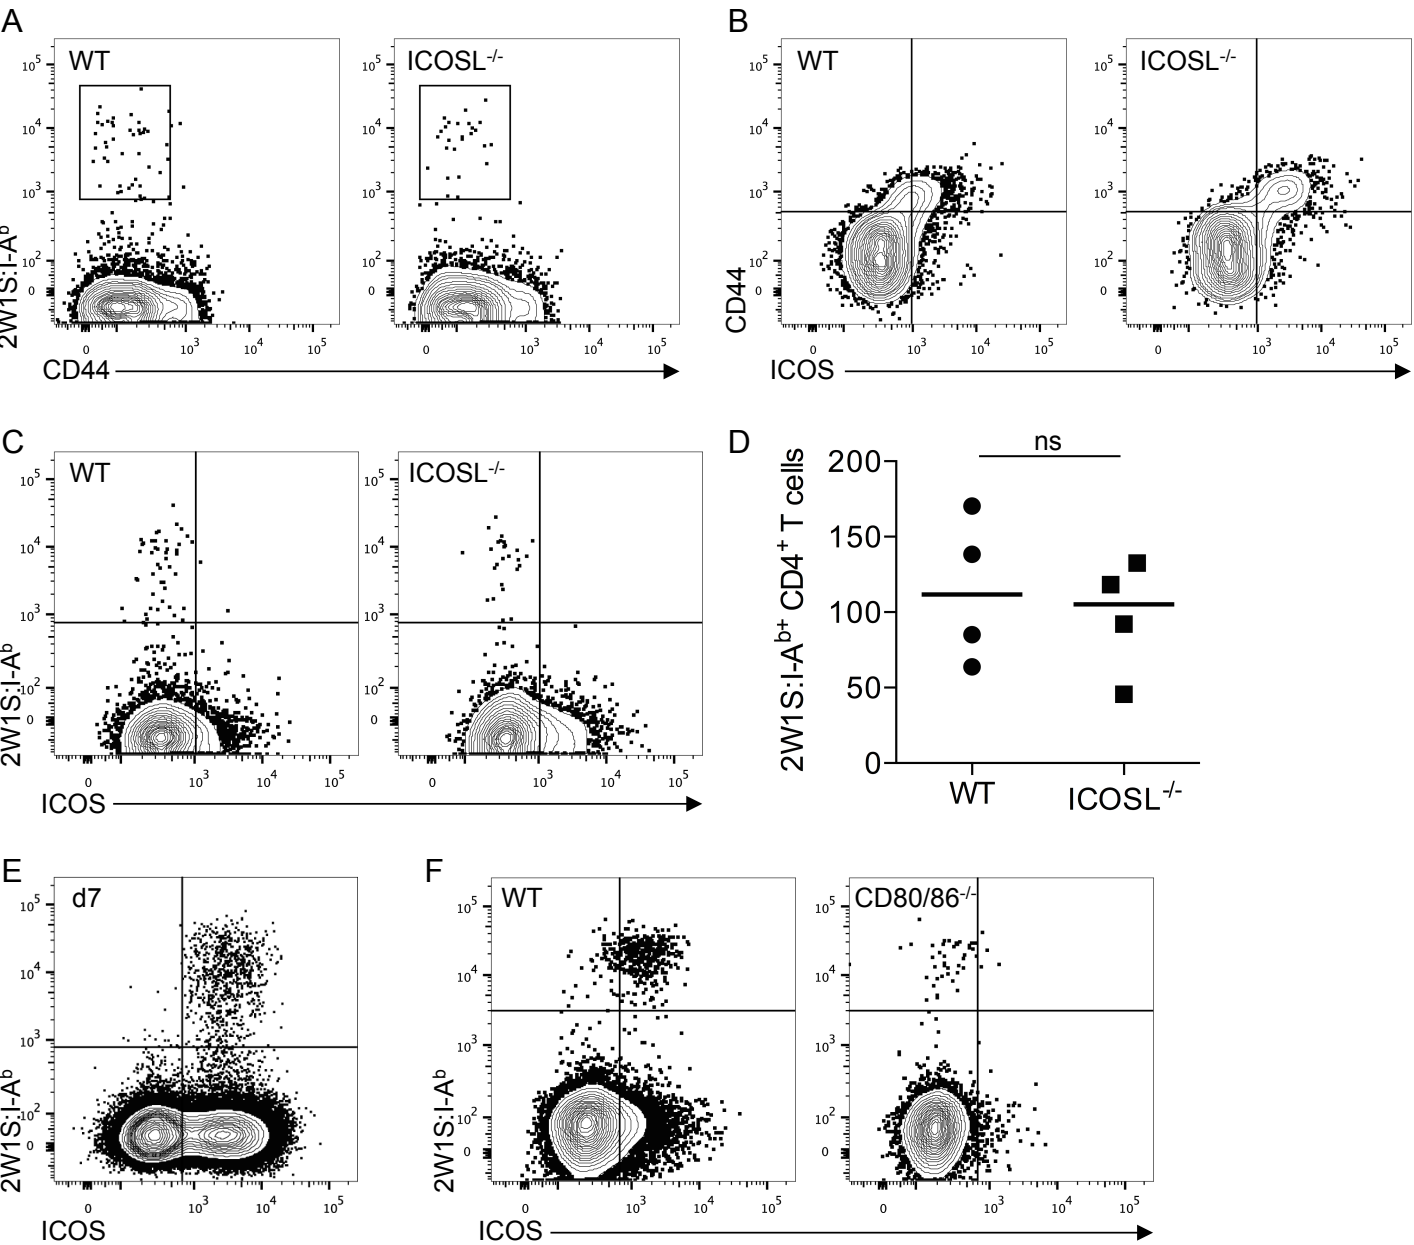

Supporting Information Figure 2

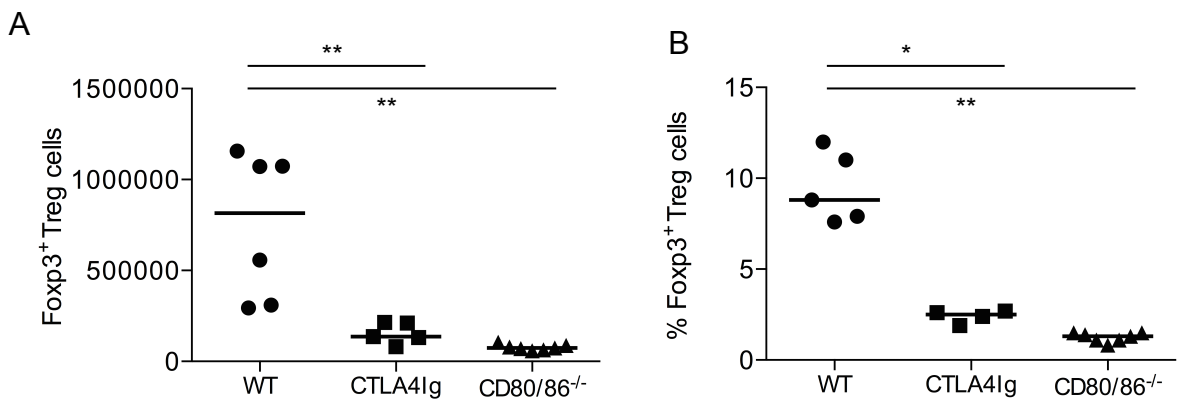

## Supporting Information Figure Legends

### **Supporting Information Figure 1**

(A) Expression of CD44 on 2W1S:I-A<sup>b+</sup> CD4<sup>+</sup> T cells from naive WT and ICOSL<sup>-/-</sup> mice. Plots are gated on CD4<sup>+</sup> T cells; show 2 mice pooled and are representative of 4 mice. (B) Expression of CD44 and ICOS by CD4<sup>+</sup> T cells from naive WT and ICOSL<sup>-/-</sup> mice. Plots are representative of 4 mice. (C) Expression of ICOS on 2W1S:I-A<sup>b+</sup> CD4<sup>+</sup> T cells from naive WT and ICOSL<sup>-/-</sup> mice. Plots are gated on CD4<sup>+</sup> T cells; show 2 mice pooled and are representative of 4 mice. (D) 2W1S:I-A<sup>b+</sup> CD4<sup>+</sup> T cells from naive WT and ICOSL<sup>-/-</sup> mice were enumerated by flow cytometry. Graph shows pooled data from 2 independent experiments. Each data point represents one mouse; bars show medians. Mann-Whitney test: ns  $p > 0.05$ . (E) Expression of ICOS on 2W1S:I-A<sup>b+</sup> CD4<sup>+</sup> T cells 7 dpi with Lm-2W1S in WT mice. Plots are gated on CD4<sup>+</sup> T cells and are representative of  $\geq 6$  mice. (F) Expression of ICOS on 2W1S:I-A<sup>b+</sup> CD4<sup>+</sup> T cells WT and CD80<sup>-/-</sup>CD86<sup>-/-</sup> 28 dpi with Lm-2W1S. Plots are gated on CD4<sup>+</sup> T cells and are representative of  $\geq 6$  mice.

### **Supporting Information Figure 2**

(A) Treg cells from WT, CTLA4IG and CD80<sup>-/-</sup>CD86<sup>-/-</sup> mice were enumerated by flow cytometry. (B) Percentage of Treg cells among CD4<sup>+</sup> T cells from WT, CTLA4IG and CD80<sup>-/-</sup>CD86<sup>-/-</sup> mice. Graphs show pooled data from  $\geq 2$  independent experiments. Each data point represents one mouse; bars show medians. Mann-Whitney test: \* $p \leq 0.05$ , \*\* $p \leq 0.01$ .
